# Supplementary material
Source: publisher site journal article supplement (https://en-cdn.bio-protocol.org/attached/file/20211110/4232%20Appendix%201%20and%202.docx)
Supplement: Supplementary file 1 [file 4232%20Appendix%201%20and%202.docx]

**Appendix I. siRNA transfection using Lipofectamine RNAiMAX**

Regents for transfection of a single glass-bottom dish:

Mixture 1:

siRNA - 1 µl (100 µM stock)

Opti-MEM - 125 µl

Mixture 2:

Lipofectamine RNAiMAX - 5 µl

Opti-MEM - 125 µl

1. Incubate both mixtures for 5 min at room temperature.
2. Change cell media to 750 µl of Opti-MEM.
3. Combine mixtures 1 and 2, incubate at room temperature for 25 min.
4. After 25 min add the combined mixture to the cells, incubate for 5 h in a cell incubator.
5. After 5 h, change the transfection medium to full cell media.

**Appendix 2**. **Step-by-step processing of the time laps images**

1. Open an acquired time-lapse image in ImageJ software, chose “colorized” as a colour mode
2. Split channels (Image->Colour->Split Channels).
3. Close the DIC channel; if required adjust brightness/contrast of the remaining channels (Image->Adjust->Brightness/Contrast…); merge the green and far-red channels (Image->Colour->Merge Channels…).
4. Create an orthogonal view of the merged image (Image->Stacks->Orthogonal Views).
5. Analyse the orthogonal views according to the step C3-C4.
6. Create a maximum Z-projection of the merged image (Image->Stacks->Z Project…; select all of the Z-slices and set “Max Intensity” as a Projection type).
7. Analyse the maximum projection according to the step C5.
